# Supplementary material for: Complex coacervation of statistical polyelectrolytes: role of monomer sequences and formation of inhomogeneous coacervates
Source: Royal Society of Chemistry journal article supplement (doi:10.1039/d1me00076d), 2021-01-01
Supplement: d1me00076d1.pdf [file d1me00076d1.pdf]

**Supporting Information:**

**Complex Coacervation of Statistical  
Polyelectrolytes: Role of Monomer Sequences  
and Formation of Inhomogeneous Coacervates**

Boyuan Yu,<sup>†</sup> Artem M. Romyantsev,<sup>†</sup> Nicholas E. Jackson,<sup>†,‡</sup> Heyi Liang,<sup>†</sup>  
Jeffrey M. Ting,<sup>†</sup> Siqi Meng,<sup>†</sup> Matthew V. Tirrell,<sup>†,‡</sup> and Juan J. de Pablo<sup>\*,†,‡</sup>

<sup>†</sup>*Pritzker School of Molecular Engineering, University of Chicago, Chicago, Illinois 60637,  
United States*

<sup>‡</sup>*Center for Molecular Engineering, Argonne National Laboratory, Lemont, Illinois 60439,  
United States*

E-mail: depablo@uchicago.edu

# 1 Comparison of statistical properties of monomer sequence generated from simulation with theoretical prediction

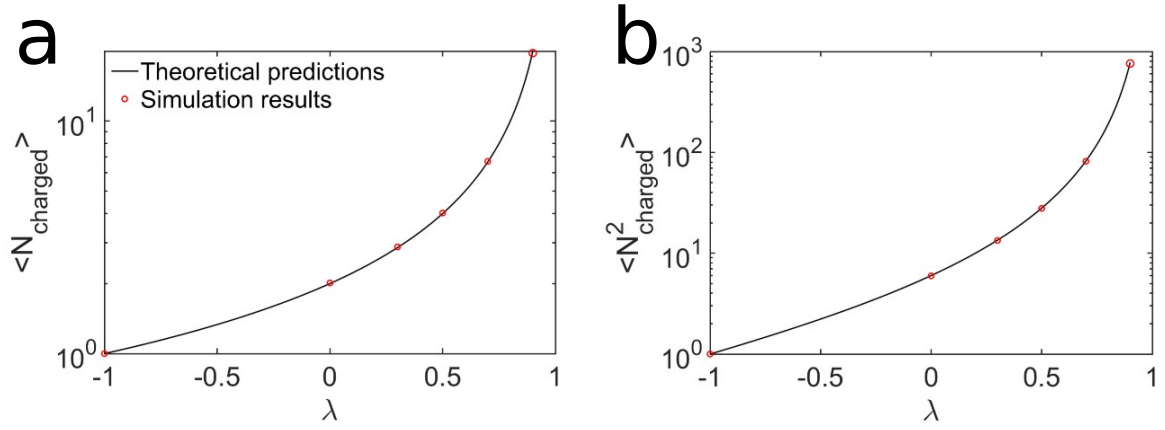

Figure S1: Semi-log plot of average charged block length  $\langle N_{\text{charged}} \rangle$  and average squared charged block length  $\langle N_{\text{charged}}^2 \rangle$  as a function of  $\lambda$  for charge density  $f = 0.5$ . Black solid lines are theoretical prediction:  $N_{\text{charged}} = \frac{1}{(1-\lambda)(1-f)}$  and  $N_{\text{charged}}^2 = \frac{1+f+\lambda(1-f)}{(1-\lambda)^2(1-f)^2}$ . Red dots are simulation results. The  $\langle \dots \rangle$  denotes ensemble average over all chains.

## 2 The importance for experimental study to maintain same charge density $f$ for polyanions with different $\lambda$ values in order to verify computational and theoretical results

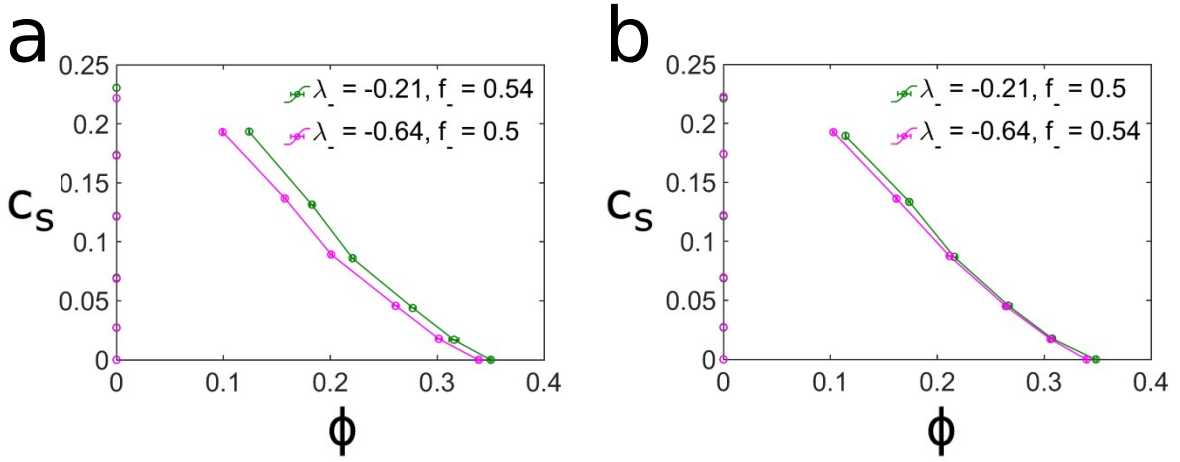

Figure S2: Simulation binodal curves for coacervates formed by fully charged polycations ( $f_+ = 1$ ) and polyanions with charge density  $f_-$  and sequence  $\lambda_-$ . a: Simulation results for the conditions of our initial experimental attempt. b: Simulation results for the conditions similar to a, but reversing the  $f_-$  of the two systems. Comparing a and b shows that besides  $\lambda_-$ ,  $f_-$  also affects coacervation behavior which needs to be controlled more preciously.

### 3 Dependence of coacervate density on $\lambda$ for different neutral monomer sizes

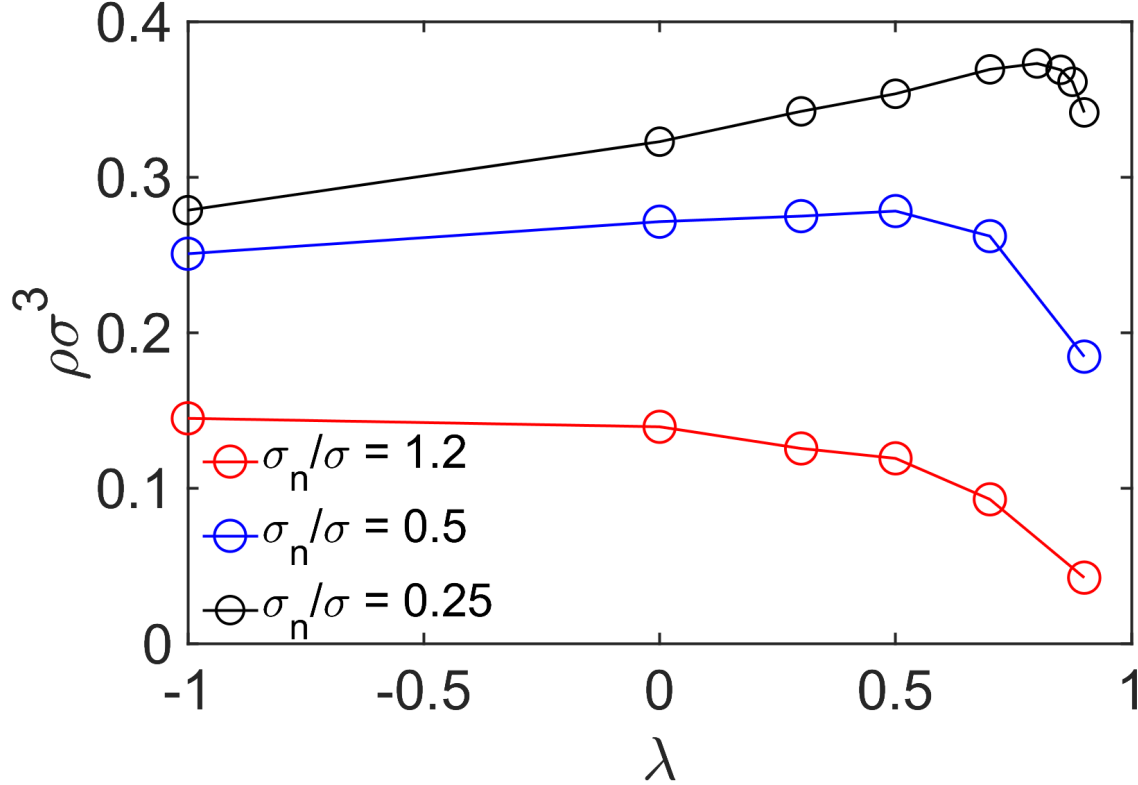

Figure S3: Dependence of the coacervate density on  $\lambda$  for different sizes of the neutral monomer,  $\sigma_n/\sigma = 1.2$ ,  $0.5$ , and  $0.25$ . The errors are smaller than the circle symbols. Simulation parameters are equal to  $f_+ = f_- = 0.5$ ,  $N = 10^2$ , and  $l_B/\sigma = 1.68$ ; the solvent quality is good. Increasing the size of the neutral monomer facilitates microphase separation, and  $\lambda^*$  shifts to lower values.

## 4 Simulation snapshots of salt-free coacervate phases formed by charged block copolymers

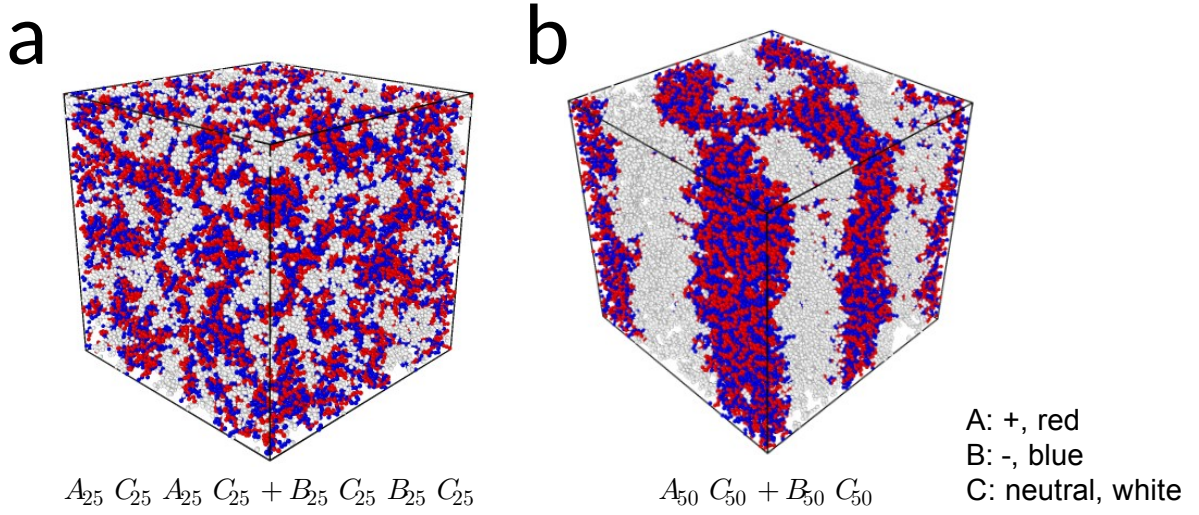

Figure S4: Simulation snapshots of salt-free coacervate phases formed by charged block copolymers using the same simulation parameters as statistical polyelectrolytes. Simulation parameters:  $f_+ = f_- = 0.5$ ,  $N = 10^2$ , and  $l_B/\sigma = 1.68$  (good solvent). a: For tetrablock copolymers, the coacervate phase is still microemulsion-like structure with high fluctuation but no obvious long range order. b: For diblock copolymers, there is a lamellar-like structure forming within coacervate phase.

## 5 Structure factors for lamellar phase of salt-free complex coacervate formed by charged diblock copolyelectrolytes

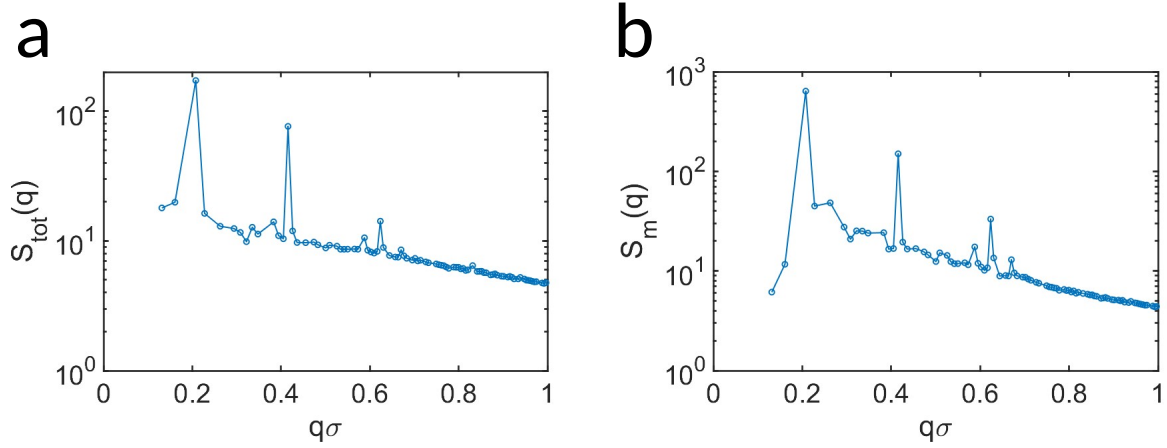

Figure S5: Structure factors for salt-free coacervates formed by oppositely charged diblock copolyelectrolytes (shown in Figure S4b). a: structure factor for all monomers,  $S_{tot}(q)$  as a function of  $q$  in log-log scale. b: Structure factor of the density difference between neutral and charged monomers,  $S_m(q)$  as a function of  $q$  in log-log scale. The peaks in structure factor plots are clear indications of lamellar-like structure within coacervate phase.

## 6 Structure factors for neutral and charged monomers of salt-free coacervate phases formed by polyelectrolytes with different $\lambda$ values

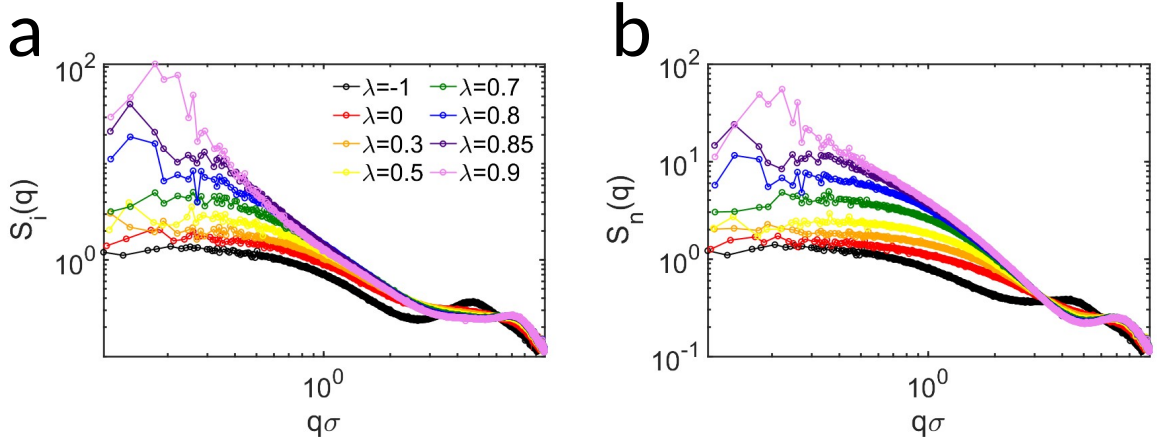

Figure S6: Structure factors for neutral and charged monomers within coacervate phases in log-log scale. Simulation parameters:  $f_+ = f_- = 0.5$ ,  $N = 10^2$ , and  $l_B/\sigma = 1.68$  (good solvent). a: Structure factor calculated for only ionic monomers,  $S_i(q)$ . b: Structure factors calculated for only neutral monomers,  $S_n(q)$ .

7 Inverse structure factor calculated based on density difference between neutral and charged monomers for  $\lambda = -1$  deviates severely from Ornstein-Zernike expression

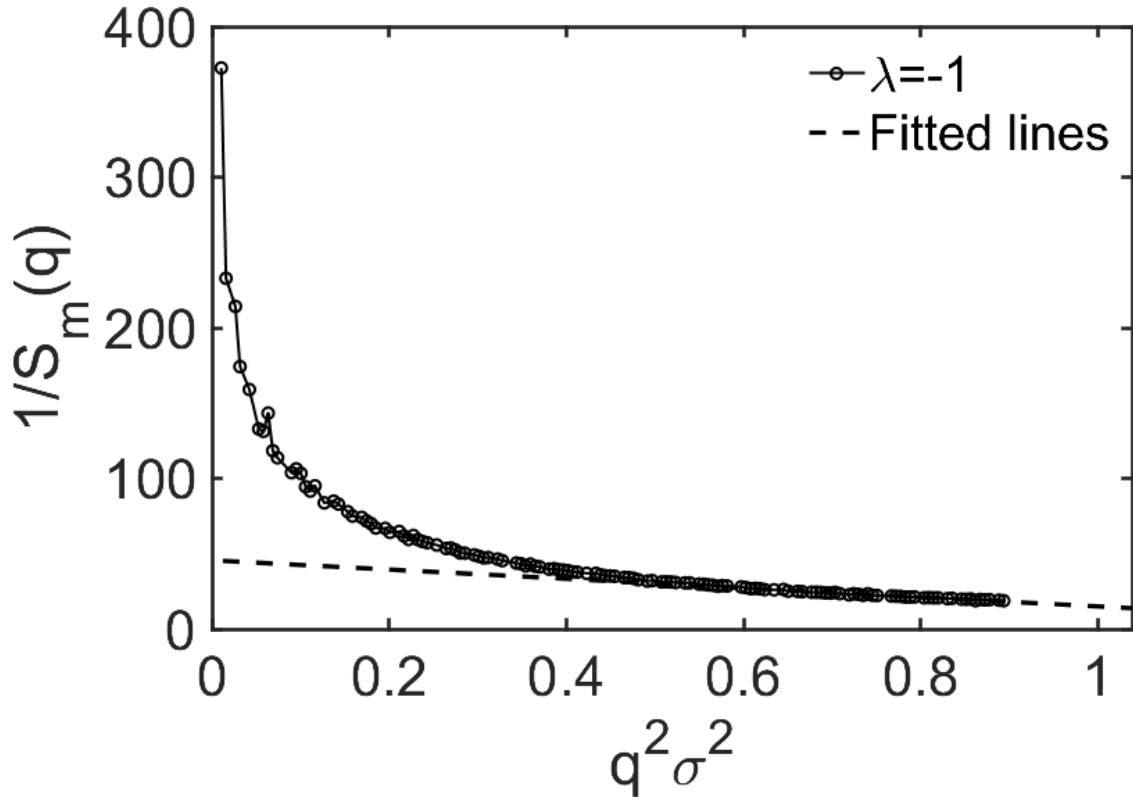

Figure S7: Inverse structure factors for  $\lambda = -1$  as a function of  $q^2$  fitted by Ornstein-Zernike expression. Simulation parameters:  $f_+ = f_- = 0.5$ ,  $N = 10^2$ , and  $l_B/\sigma = 1.68$  (good solvent).

## 8 Inverse structure factors calculated based on density difference between neutral and charged monomers for different $\lambda$ values are fitted by microemulsion structure factor

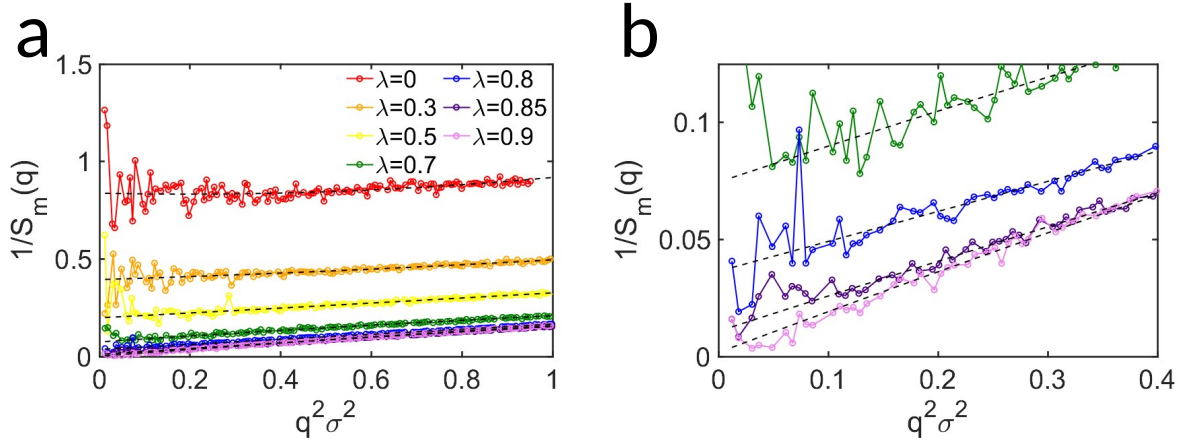

Figure S8: Inverse structure factors,  $1/S_m(q)$  for different  $\lambda$  values as a function of  $q^2$  fitted by microemulsion structure factor:  $1/S(q)_m = c_0 q^4 + c_1 q^2 + c_2$ . Dash lines are fitted lines. a: full plot with  $0 < 1/S_m(q) < 1.5$  and  $0 < q^2 \sigma^2 \leq 1$ ; b: partially enlarged plot of a with  $0 < 1/S_m(q) < 0.125$  and  $0 < q^2 \sigma^2 \leq 0.4$ . Simulation parameters:  $f_+ = f_- = 0.5$ ,  $N = 10^2$ , and  $l_B/\sigma = 1.68$  (good solvent).

Table S1: Fitted coefficients of microemulsion structure factor for Figure S8.

| $\lambda$ | $c_0$  | $c_1$  | $c_2$ |
|-----------|--------|--------|-------|
| 0         | 0.132  | -0.051 | 0.838 |
| 0.3       | 0.030  | 0.072  | 0.394 |
| 0.5       | 0.004  | 0.124  | 0.198 |
| 0.7       | -0.022 | 0.156  | 0.074 |
| 0.8       | 0.003  | 0.127  | 0.036 |
| 0.85      | -0.008 | 0.151  | 0.011 |
| 0.9       | -0.020 | 0.176  | 0.002 |

## 9 Inverse structure factors calculated based on density difference between neutral and charged monomers for different $\lambda$ values are fitted by Porod's law

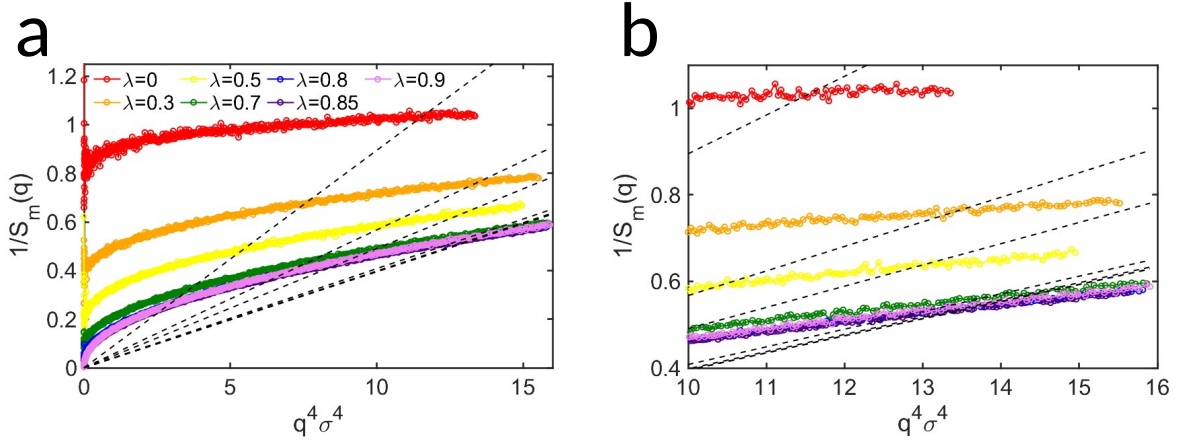

Figure S9: Inverse structure factors,  $1/S_m(q)$  for different  $\lambda$  values as a function of  $q^4$  fitted by Porod's law:  $1/S(q)_m = c_0 q^4$  at high  $q$  regime ( $10 < q^4 \sigma^4 < 16$ ). Dash lines are fitted lines. a: full plot with  $0 < 1/S_m(q) \leq 1.2$  and  $0 < q^4 \sigma^4 < 16$ ; b: partially enlarged plot of a with  $0.4 \leq 1/S_m(q) \leq 1.2$  and  $10 < q^4 \sigma^4 < 16$ . Simulation parameters:  $f_+ = f_- = 0.5$ ,  $N = 10^2$ , and  $l_B/\sigma = 1.68$  (good solvent).
